# Supplementary material for: Early phase II study of mixed 19‐peptide vaccine monotherapy for refractory triple‐negative breast cancer
Source: PubMed Central journal article supplement — Cancer Sci. 2020 Jun 25;111(8):2760–9. doi: 10.1111/cas.14510 (PMC7419019; doi:10.1111/cas.14510), 2020-06-25
Supplement: CAS-111-2760-s006.pdf [file CAS-111-2760-s006.pdf]

(様式 2)

久留米大学  $\left[ \begin{array}{l} \text{○医 療} \\ \text{生 命} \end{array} \right]$  に関する倫理審査結果通知書

平成26年6月30日

申請者 唐 宇飛 殿

久留米大学  
学長 永田 見生

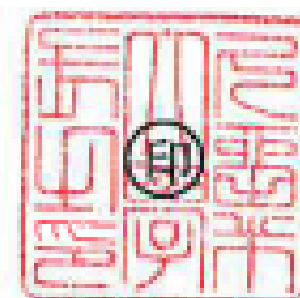

研究番号 14064

標 題 標準治療抵抗性トリプルネガティブ (Triple negative: TN)乳がんに対する19種混合ペプチドワクチン (KRM-19)療法の早期第Ⅱ相臨床試験

研 究 者 赤木 由人・唐 宇飛 他

上記  $\left[ \begin{array}{l} \text{○研究計画} \\ \text{公表申請} \end{array} \right]$  は久留米大学  $\left[ \begin{array}{l} \text{○医 療} \\ \text{生 命} \end{array} \right]$  に関する倫理委員会 (迅速審査)

の審査結果をふまえ、下記のように判定したので通知する。

記

| 判 定                           | ○承認する<br>承認しない | 条件付きで承認する<br>該当しない | 再審査 |
|-------------------------------|----------------|--------------------|-----|
| 条 件 又 は<br>変 更 に 関<br>す る 意 見 |                |                    |     |

(様式 2)

久留米大学  医療  生命 に関する倫理審査結果通知書  
Protocol Approval document

平成26年6月30日

申請者 唐 宇飛 殿

2014 June 30

To Applicant Dr. Toh Uhi

久留米大学  
学長 永田 見生

Kurume University  
President Nagata Kensei

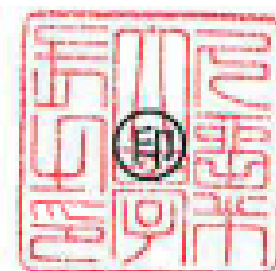

研究番号 14064 #14064

標 題 標準治療抵抗性トリプルネガティブ (Triple negative: TN)乳がんに対する19種混合ペプチドワクチン (KRM-19)療法の早期第Ⅱ相臨床試験

研究者 赤木 由人・唐 宇飛 他

Title ;Early Phase II study of mixed 19-peptide vaccine for triple negative breast cancer by Akagi Yoshito & Toh Uhi

上記  研究計画  医療  生命 は久留米大学  医療  生命 に関する倫理委員会 (迅速審査)  
 公表申請

の審査結果をふまえ、下記のように判定したので通知する。

Notice

記

| 判 定                           | ○承認する    | 条件付きで承認する | 再審査   |
|-------------------------------|----------|-----------|-------|
|                               | Approval | 承認しない     | 該当しない |
| 条 件 又 は<br>変 更 に 関<br>す る 意 見 |          |           |       |
